# Supplementary material
Source: bioRxiv or medRxiv preprint supplement (https://www.biorxiv.org/highwire/filestream/118949/field_highwire_adjunct_files/8/387316-17.pdf)

**A**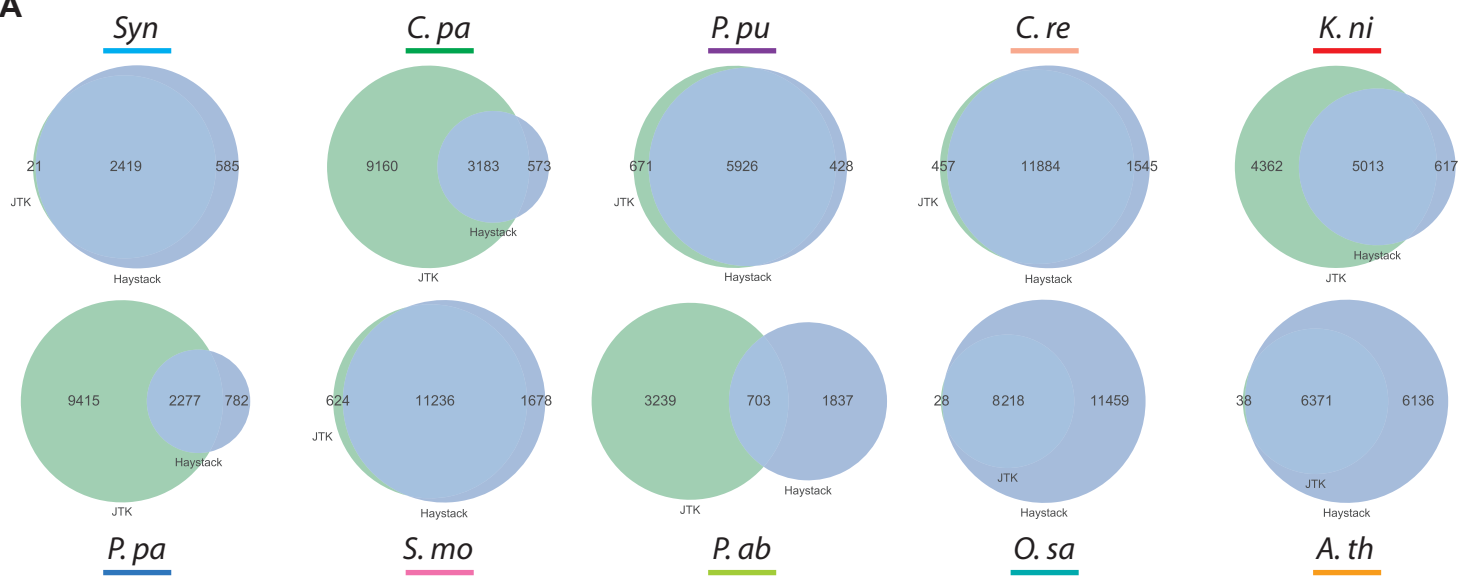**B**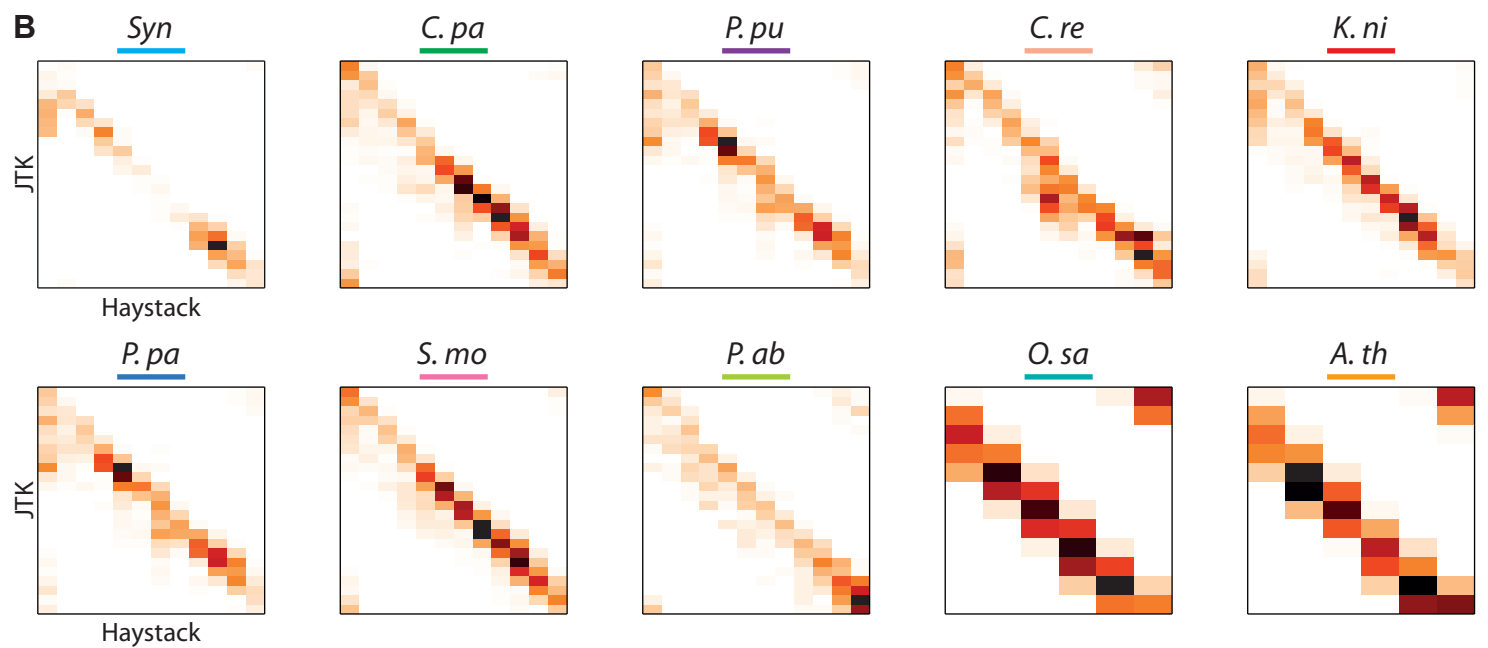**C**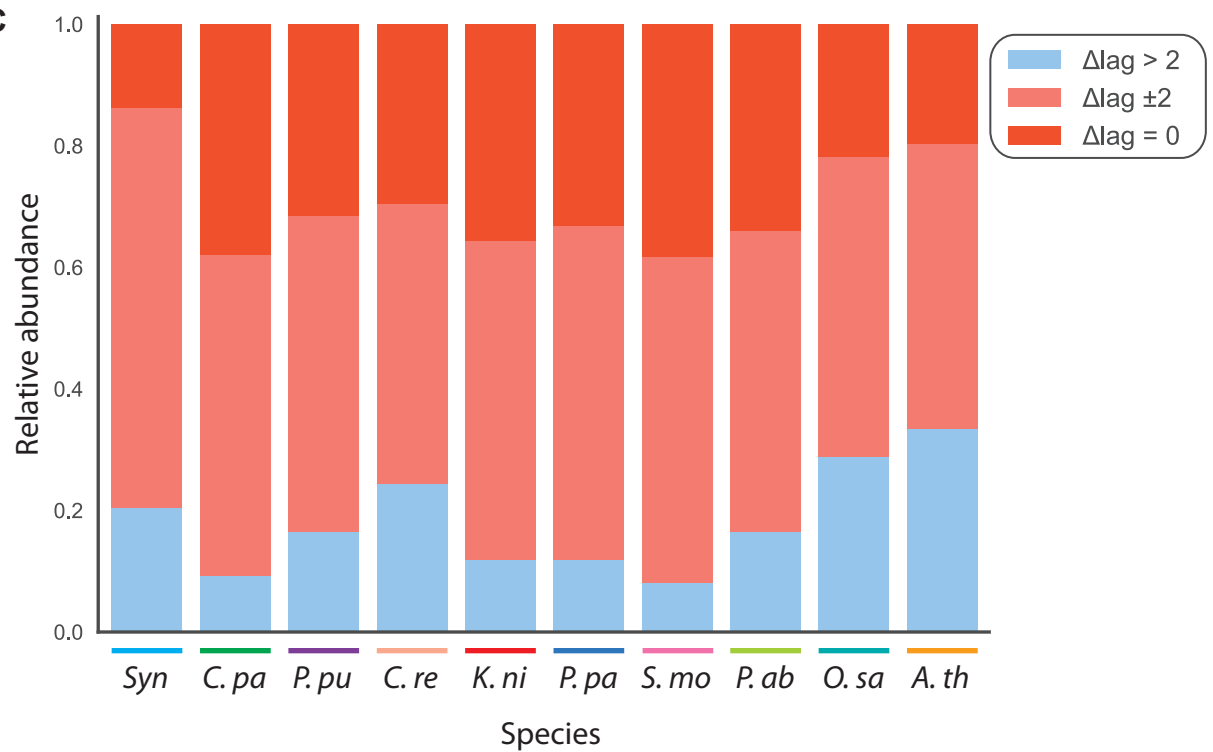

Supplement: Supplementary file [file 387316-17.pdf]
